# Supplementary material
Source: publisher site journal article supplement (https://www.dovepress.com/article/595430)
Supplement: Supplementary file 1 [file 595430%20Supplementary%20Material.docx]

**CONTENTS.**

**Figure S1** Canonical architecture of an individual deep learning submodel used for property prediction. Each submodel consists of three fully connected hidden layers with 2,048, 1,024, and 128 units, respectively, employing ReLU activation functions. The network is trained independently for each property to enable modular construction of the 33-dimensional drug-likeness spectrum.

**Table S1** Composition of the 33 property datasets and overview of the corresponding predictive submodels. The table summarizes the classification of properties into physicochemical properties, pharmacokinetics, efficacy, safety, and stability, along with the associated training datasets and model configurations.

**Table S2** Predictive performance of the 33 property-specific deep learning submodels on independent test sets. Performance metrics for each submodel are reported to assess predictive reliability across the individual property domains.

**Table S3** Molecular docking scores of the reference drugs and the top fifteen candidate molecules. The table lists the lowest predicted binding energies (kcal/mol) within the primary binding cavity of PBP2, providing quantitative support for the docking analysis discussed in the main text.


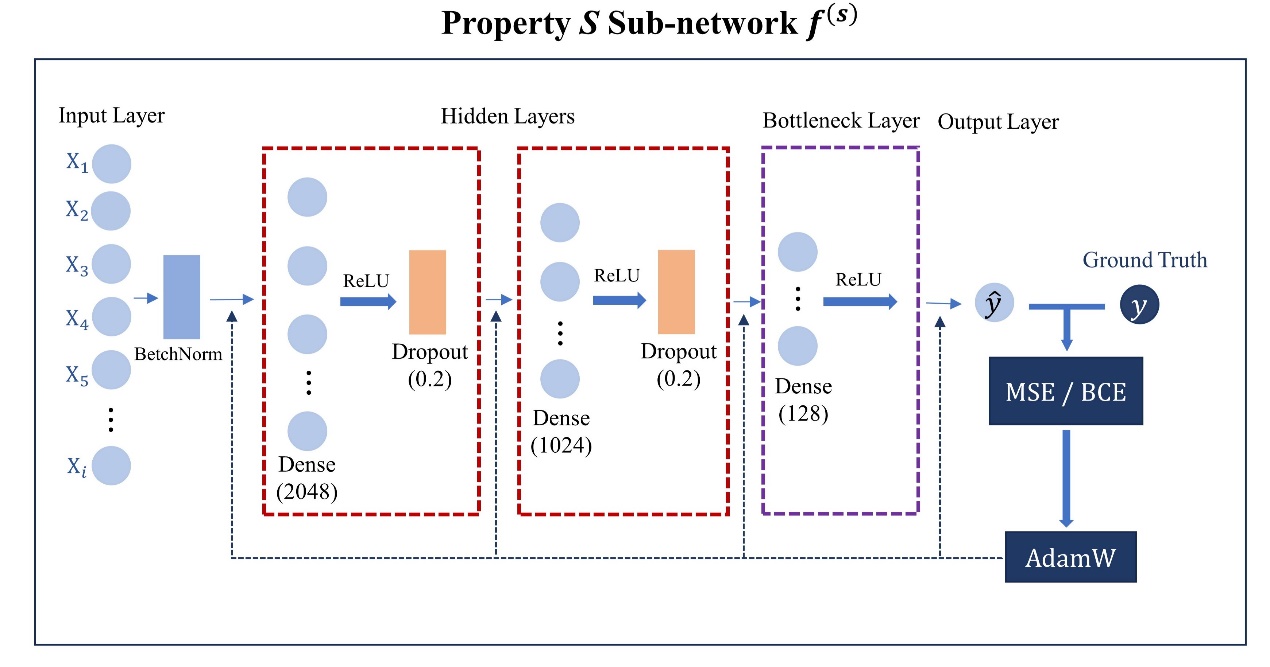


**Figure S1** Canonical architecture of an individual deep learning submodel used for property prediction. Each submodel consists of three fully connected hidden layers with 2,048, 1,024, and 128 units, respectively, employing ReLU activation functions. The network is trained independently for each property to enable modular construction of the 33-dimensional drug-likeness spectrum.

**Table S1** Composition of the 33 property datasets and overview of the corresponding predictive submodels

| No. | Name | Class | Training set | Validation set | Testing set |
| --- | --- | --- | --- | --- | --- |
| S1 | Aqueous solubility (LogS) | C1 | 251267 | 53847 | 53851 |
| S2 | Octanol–water partition coefficient (log P) | C1 | 286544 | 61254 | 61263 |
| S3 | Melting point | C1 | 130559 | 27972 | 27984 |
| S4 | Boiling point | C1 | 125784 | 26958 | 26962 |
| S5 | Surface tension | C1 | 59168 | 12679 | 12697 |
| S6 | Density | C1 | 167325 | 35846 | 35869 |
| S7 | Viscosity | C1 | 109081 | 23374 | 23392 |
| S8 | Flash point | C1 | 161846 | 34675 | 34683 |
| S9 | Vapor pressure | C1 | 137928 | 29558 | 29564 |
| S10 | Dissociation constant | C1 | 257753 | 55163 | 55319 |
| S11 | Hydrolysis (half-life value) | C1 | 117046 | 25098 | 25183 |
| S12 | Bioavailability | C2 | 39298 | 8417 | 8461 |
| S13 | Plasma protein binding rate | C2 | 77264 | 16547 | 16583 |
| S14 | Maximal rate of metabolism | C2 | 102937 | 22054 | 22068 |
| S15 | Biliary excretion rate | C2 | 44518 | 9539 | 9671 |
| S16 | Urinary excretion rate | C2 | 57047 | 12248 | 12239 |
| S17 | Volume of distribution | C2 | 137489 | 29439 | 29586 |
| S18 | Half-life | C2 | 129632 | 27747 | 27864 |
| S19 | Minimum Inhibitory Concentration (MIC) | C3 | 335587 | 71956 | 71998 |
| S20 | Enzyme inhibition constant（Ki） | C3 | 137418 | 29447 | 29456 |
| S21 | Receptor affinity | C3 | 185813 | 39736 | 39973 |
| S22 | Maximum effect model parameter (Emax) | C3 | 48246 | 10348 | 10369 |
| S23 | 50% effective dose（EC50） | C3 | 161724 | 34648 | 34623 |
| S24 | Median lethal dose (LD50) | C4 | 161591 | 34627 | 34654 |
| S25 | No Observed Adverse Effect Level (NOAEL) | C4 | 206658 | 44246 | 44289 |
| S26 | Tetrahymena pyriformis 50% growth inhibition concentration | C4 | 245736 | 52639 | 52784 |
| S27 | Median lethal concentration (LC50) | C4 | 155369 | 33247 | 33286 |
| S28 | Developmental toxicity | C4 | 257561 | 55142 | 55364 |
| S29 | Ames mutagenicity | C4 | 397734 | 85237 | 85368 |
| S30 | hERG_risk | C4 | 174397 | 37296 | 37412 |
| S31 | Chemical stability | C5 | 249362 | 53447 | 53586 |
| S32 | Thermostability | C5 | 335341 | 71839 | 71964 |
| S33 | Light stability | C5 | 33789 | 7228 | 7243 |

**Notes:** The table summarizes the classification of properties (where C1 denotes physicochemical properties, C2 pharmacokinetics, C3 efficacy, C4 safety, and C5 stability) and lists the corresponding training datasets and model configurations.

**Table S2** Predictive performance of the 33 property-specific deep learning submodels on independent test sets

| Number | Task Type | Evaluation Metric | Performance |
| --- | --- | --- | --- |
| S1 | Regression | R2 | 0.87 |
| S2 | Regression | R2 | 0.89 |
| S3 | Regression | R2 | 0.86 |
| S4 | Regression | R2 | 0.92 |
| S5 | Regression | R2 | 0.94 |
| S6 | Regression | R2 | 0.89 |
| S7 | Regression | R2 | 0.88 |
| S8 | Regression | R2 | 0.91 |
| S9 | Regression | R2 | 0.93 |
| S10 | Regression | R2 | 0.95 |
| S11 | Regression | R2 | 0.92 |
| S12 | Regression | R2 | 0.88 |
| S13 | Regression | R2 | 0.86 |
| S14 | Regression | R2 | 0.87 |
| S15 | Regression | R2 | 0.86 |
| S16 | Regression | R2 | 0.88 |
| S17 | Regression | R2 | 0.89 |
| S18 | Regression | R2 | 0.89 |
| S19 | Regression | R2 | 0.93 |
| S20 | Regression | R2 | 0.95 |
| S21 | Regression | R2 | 0.91 |
| S22 | Regression | R2 | 0.93 |
| S23 | Regression | R2 | 0.92 |
| S24 | Regression | R2 | 0.93 |
| S25 | Regression | R2 | 0.91 |
| S26 | Regression | R2 | 0.92 |
| S27 | Regression | R2 | 0.96 |
| S28 | Classification | AUC | 0.93 |
| S29 | Classification | AUC | 0.96 |
| S30 | Classification | AUC | 0.95 |
| S31 | Classification | AUC | 0.96 |
| S32 | Classification | AUC | 0.91 |
| S33 | Classification | AUC | 0.92 |

**Notes:** Performance metrics for each submodel are reported to assess predictive reliability across the individual property domains.

**Abbreviations:** R², coefficient of determination; AUC, area under the receiver operating characteristic curve.

**Table S3** Molecular docking scores of the reference drugs and the top fifteen candidate molecules

| Cavity Volumes | | | | | | | | | |
| --- | --- | --- | --- | --- | --- | --- | --- | --- | --- |
| 517 Å3 | | 549 Å3 | | 286 Å3 | | 635 Å3 | | 510 Å3 | |
| Compd. no | kcal/mol | Compd. no | kcal/mol | Compd. no | kcal/mol | Compd. no | kcal/mol | Compd. no | kcal/mol |
| Cefradine | -7.9 | Cefradine | -7.5 | Cefradine | -6.9 | Cefradine | -6.3 | Cefradine | -6.3 |
| Cefuroxime | -8.5 | Cefuroxime | -7.4 | Cefuroxime | -6.3 | Cefuroxime | -5.9 | Cefuroxime | -6.4 |
| Ceftriaxone | -8.4 | Ceftriaxone | -8.5 | Ceftriaxone | -7.5 | Ceftriaxone | -7.2 | Ceftriaxone | -7.9 |
| M1 | -8.6 | M1 | -7.7 | M1 | -7.3 | M1 | -6.5 | M1 | -6.1 |
| M2 | -8.8 | M2 | -7.8 | M2 | -6.8 | M2 | -6.7 | M2 | -6.4 |
| M3 | -9.3 | M3 | -8.2 | M3 | -7.6 | M3 | -6.6 | M3 | -6.8 |
| M4 | -8.0 | M4 | -7.7 | M4 | -7.2 | M4 | -6.5 | M4 | -5.6 |
| M5 | -8.7 | M5 | -7.8 | M5 | -7.4 | M5 | -6.9 | M5 | -6.4 |
| M6 | -10.2 | M6 | -9.3 | M6 | -7.9 | M6 | -7.8 | M6 | -7.2 |
| M7 | -8.4 | M7 | -8.0 | M7 | -7.2 | M7 | -6.5 | M7 | -6.6 |
| M8 | -8.1 | M8 | -7.6 | M8 | -7.4 | M8 | -6.4 | M8 | -6.3 |
| M9 | -9.9 | M9 | -7.9 | M9 | -7.0 | M9 | -6.4 | M9 | -5.9 |
| M10 | -8.3 | M10 | -8.3 | M10 | -8.2 | M10 | -6.8 | M10 | -7.1 |
| M11 | -7.6 | M11 | -6.5 | M11 | -6.7 | M11 | -5.7 | M11 | -6.0 |
| M12 | -8.2 | M12 | -7.6 | M12 | -7.4 | M12 | -6.6 | M12 | -7.6 |
| M13 | -8.5 | M13 | -7.7 | M13 | -7.3 | M13 | -7.2 | M13 | -6.4 |
| M14 | -8.6 | M14 | -7.7 | M14 | -6.5 | M14 | -7.0 | M14 | -6.8 |
| M15 | -8.4 | M15 | -6.8 | M15 | -6.7 | M15 | -6.0 | M15 | -6.5 |

**Notes:** The table lists the predicted binding energies (kcal/mol) of the reference drugs and candidate molecules in each of the five CB-Dock2-predicted ligand-accessible cavities of PBP2.
